# Supplementary material
Source: PubMed Central journal article supplement (PMC3481858)
Supplement: NIHMS405969-supplement-Supporting_Information.pdf [file NIHMS405969-supplement-Supporting_Information.pdf]

# **CHEMISTRY**

---

## **AN ASIAN JOURNAL**

### Supporting Information

© Copyright Wiley-VCH Verlag GmbH & Co. KGaA, 69451 Weinheim, 2012

#### **Selective Detection of Multicarboxylate Anions based on “Turn on” Electron Transfer by Self-Assembled Molecular Rectangles**

**Anurag Mishra,<sup>[a]</sup> Sunmi Lee,<sup>[a]</sup> Hyunuk Kim,<sup>[b]</sup> Timothy R. Cook,<sup>[c]</sup> Peter J. Stang,<sup>[c]</sup> and Ki-Whan Chi\*<sup>[a]</sup>**

asia\_201200488\_sm\_miscellaneous\_information.pdf

## Table of Contents

1. **Figure S1.** Comparison of the  $^1\text{H}$  NMR aromatic region of (a) Ru acceptor **2**, (b) amide ligand **1**, and (c) self-assembled [2+2] rectangle **4** in Nitromethane- $\text{d}_3$  solvent.
2. **Figure S2.** Comparison of the  $^1\text{H}$  NMR aromatic region of (a) Ru acceptor **3**, (b) amide ligand **1**, and (c) self-assembled [2+2] rectangle **5** in Nitromethane- $\text{d}_3$  solvent.
3. **Figure S3.** Job plot of tartrate anion titrations with **5**.
4. **Figure S4.**  $^1\text{H}$  NMR spectra of **5** in acetone with increasing amounts of  $[\text{Bu}_4\text{N}]_2$  oxalate. (a) 0, (b) 0.5, and (c) 1.0 equiv of  $[\text{Bu}_4\text{N}]_2$  oxalate.
5. **Table S1.** Crystal data and structure refinement for **5**.

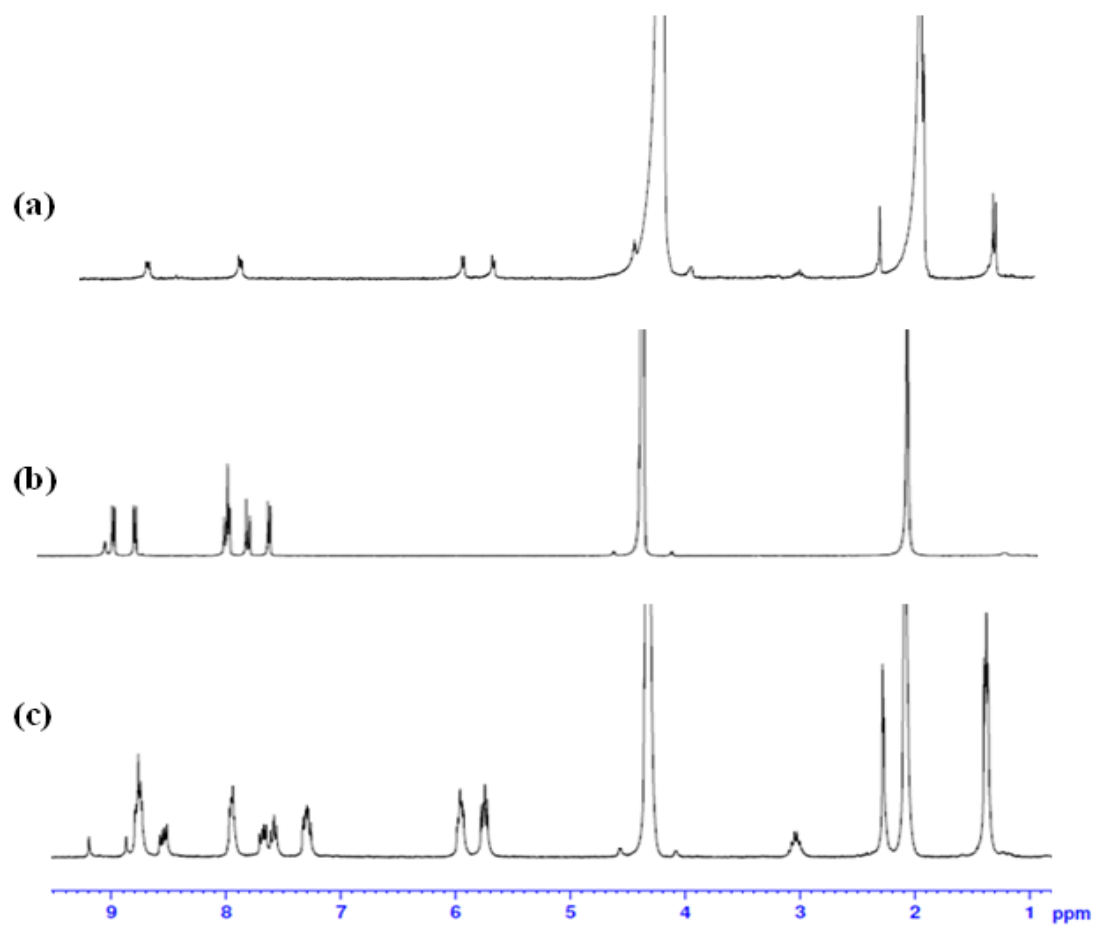

**Figure S1.** Comparison of the  $^1\text{H}$  NMR aromatic region of (a) Ru acceptor **2**, (b) amide ligand **1**, and (c) self-assembled [2+2] rectangle **4** in Nitromethane- $\text{d}_3$  solvent.

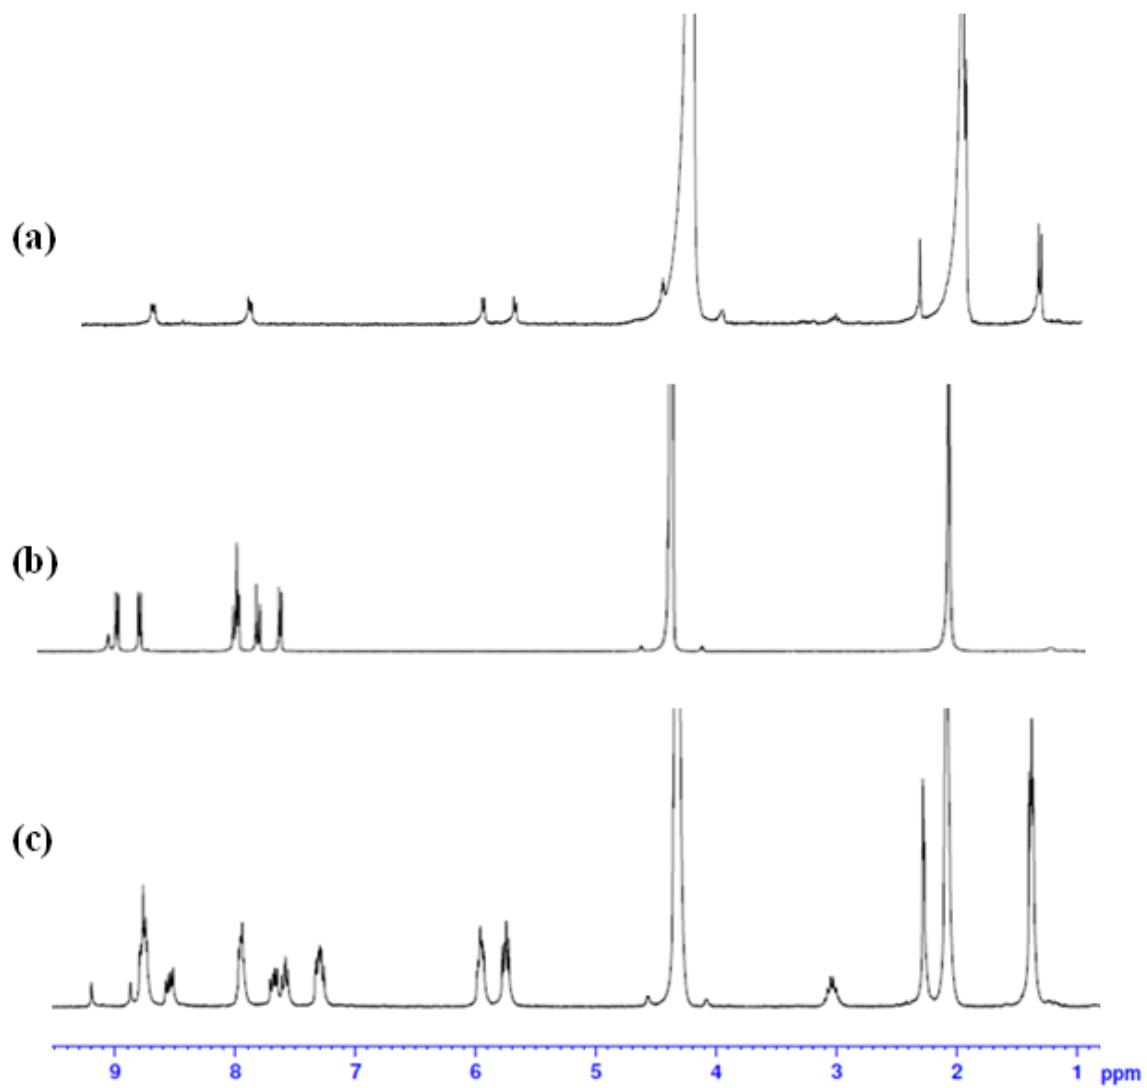

**Figure S2.** Comparison of the  $^1\text{H}$  NMR aromatic region of (a) Ru acceptor **3**, (b) amide ligand **1**, and (c) self-assembled [2+2] rectangle **5** in Nitromethane- $\text{d}_3$  solvent.

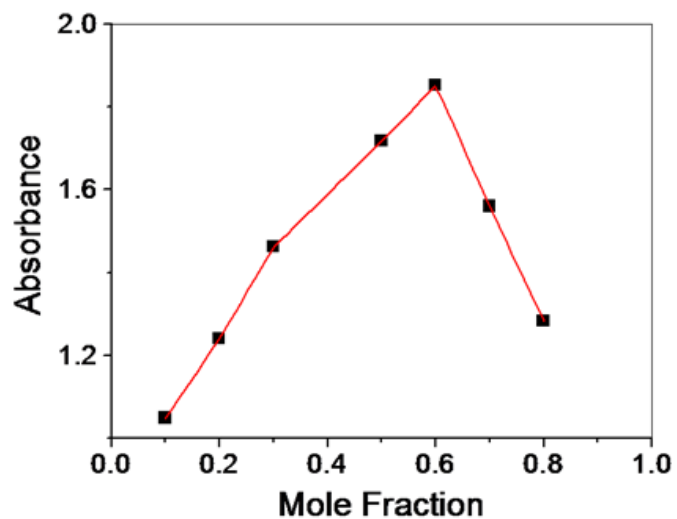

**Figure S3.** Job plot of tartrate anion titrations with **5**.

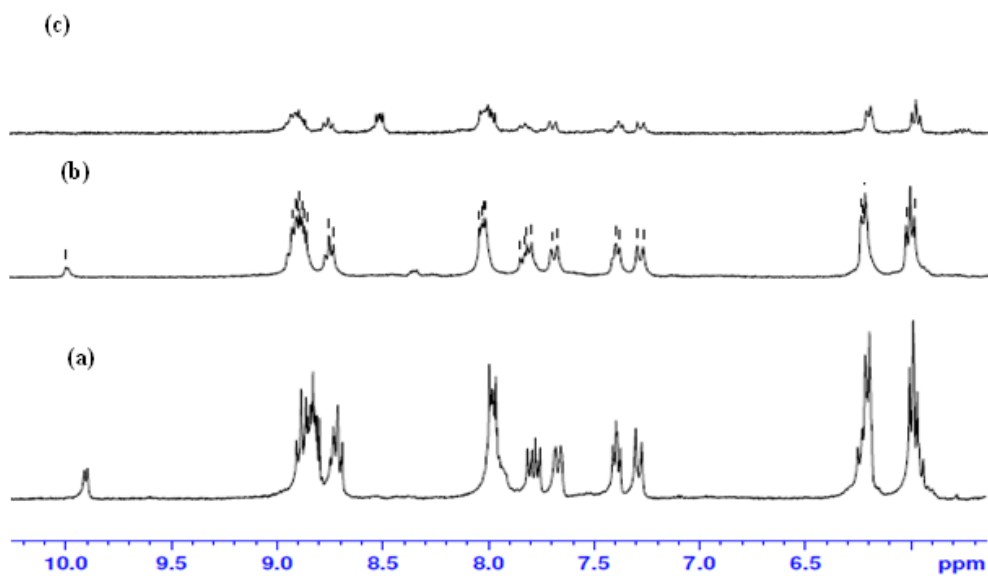

**Figure S4.**  $^1\text{H}$  NMR spectra of **5** in acetone with increasing amounts of  $[\text{Bu}_4\text{N}]_2$  oxalate. (a) 0, (b) 0.5, and (c) 1.0 equiv of  $[\text{Bu}_4\text{N}]_2$  oxalate.

**Table S1.** Crystal data and structure refinement for **5**.

|                                   |                                                                    |                           |
|-----------------------------------|--------------------------------------------------------------------|---------------------------|
| Empirical formula                 | C130 H132 F12 N8 O30 Ru4 S4                                        |                           |
| Formula weight                    | 3046.96                                                            |                           |
| Temperature                       | 100(2) K                                                           |                           |
| Wavelength                        | 0.80000 Å                                                          |                           |
| Crystal system                    | Monoclinic                                                         |                           |
| Space group                       | <i>P21/c</i>                                                       |                           |
| Unit cell dimensions              | $a = 18.232(4)$ Å                                                  | $\alpha = 90^\circ$       |
|                                   | $b = 20.125(4)$ Å                                                  | $\beta = 106.85(3)^\circ$ |
|                                   | $c = 18.433(4)$ Å                                                  | $\gamma = 90^\circ$       |
| Volume                            | $6473(2)$ Å <sup>3</sup>                                           |                           |
| Z                                 | 2                                                                  |                           |
| Density (calculated)              | 1.563 g/cm <sup>3</sup>                                            |                           |
| Absorption coefficient            | 0.838 mm <sup>-1</sup>                                             |                           |
| F(000)                            | 3112                                                               |                           |
| Crystal size                      | 0.20 x 0.10 x 0.10 mm <sup>3</sup>                                 |                           |
| Theta range for data collection   | 1.74 to 24.90°                                                     |                           |
| Index ranges                      | $-19 \leq h \leq 19$ , $-21 \leq k \leq 21$ , $-19 \leq l \leq 18$ |                           |
| Reflections collected             | 28671                                                              |                           |
| Independent reflections           | 7714 [R(int) = 0.0325]                                             |                           |
| Completeness to theta = 24.90°    | 97.5 %                                                             |                           |
| Absorption correction             | Semi-empirical from equivalents                                    |                           |
| Max. and min. transmission        | 0.9209 and 0.8504                                                  |                           |
| Refinement method                 | Full-matrix least-squares on F <sup>2</sup>                        |                           |
| Data / restraints / parameters    | 7714 / 154 / 853                                                   |                           |
| Goodness-of-fit on F <sup>2</sup> | 1.686                                                              |                           |
| Final R indices [I > 2sigma(I)]   | R1 = 0.1153, wR2 = 0.3480                                          |                           |
| R indices (all data)              | R1 = 0.1228, wR2 = 0.3574                                          |                           |
| Extinction coefficient            | 0.016(2)                                                           |                           |
| Largest diff. peak and hole       | 1.654 and -0.814 e.Å <sup>-3</sup>                                 |                           |
